# Supplementary material for: A facile and one-pot synthesis of fluorescent graphitic carbon nitride quantum dots for bio-imaging applications
Source: Royal Society of Chemistry journal article supplement (doi:10.1039/c7nj00058h), 2017-01-01
Supplement: c7nj00058h1.pdf [file c7nj00058h1.pdf]

## Supplementary Information for

### **A facile and one-pot synthesis of fluorescent graphitic carbon nitride quantum dots for bio-imaging application**

Yan Zhan,<sup>a</sup> Zhiming Liu,<sup>b</sup> Qingqing Liu,<sup>c</sup> Di Huang,<sup>a</sup> Yan Wei,<sup>a</sup> Yinchun Hu,<sup>a</sup>

Xiaojie Lian<sup>a</sup> and Chaofan Hu<sup>\*ad</sup>

<sup>a</sup>College of Mechanics, Taiyuan University of Technology, Taiyuan 030024, China

<sup>b</sup>MOE Key Laboratory of Laser Life Science, College of Biophotonics, South China Normal University, Guangzhou 510631, China

<sup>c</sup>College of Materials Science and Engineering, Taiyuan University of Technology, Taiyuan 030024, China

<sup>d</sup>College of Materials and Energy, South China Agricultural University, Guangzhou 510642, China

\*Corresponding author: Tel: +86-0351-6014477; Fax: +86-0351-6011816

E-mail address: [hcf0000@126.com](mailto:hcf0000@126.com)

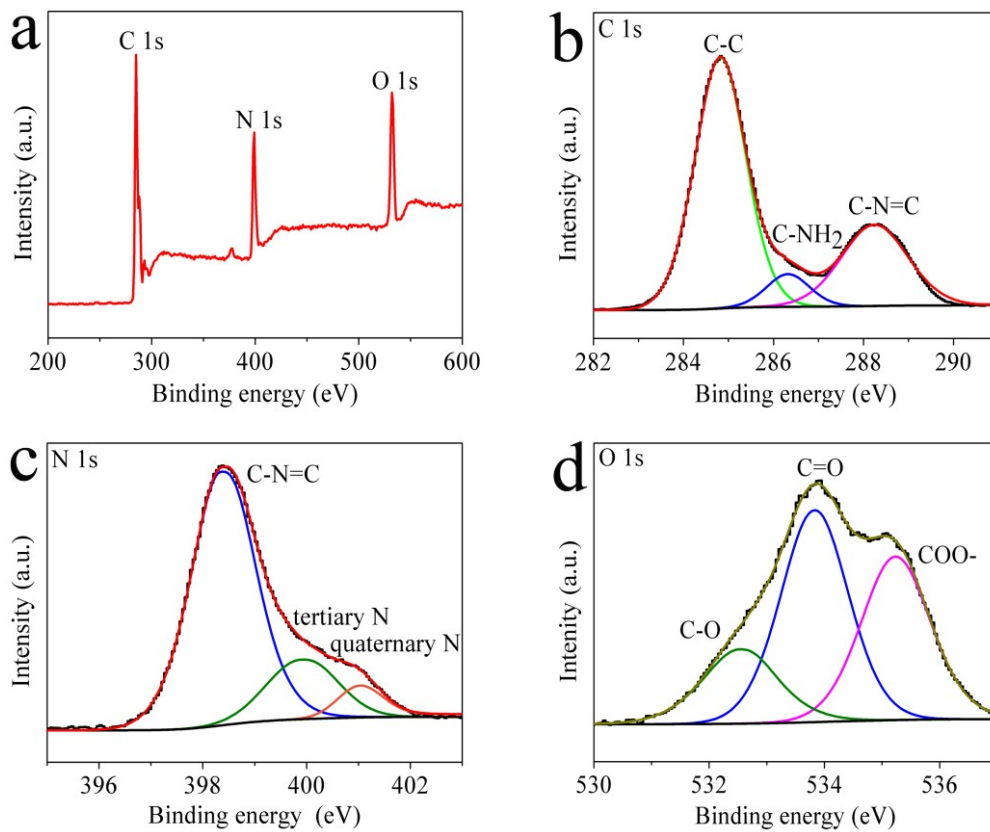

**Fig. S1** (a) XPS survey spectra of g-C<sub>3</sub>N<sub>4</sub> nanosheets. (b, c and d) XPS C 1s, N 1s and O 1s spectra of g-C<sub>3</sub>N<sub>4</sub> nanosheets.
